# Supplementary material for: Inconsistent hydrogen bond-mediated vibrational coupling of amide I
Source: Royal Society of Chemistry journal article supplement (doi:10.1039/d2ra07177k), 2023-01-01
Supplement: d2ra07177k13.pdf [file d2ra07177k13.pdf]

SUPPORTING INFORMATION

**Inconsistent Hydrogen Bond Mediated Vibrational Coupling of Amide I**

Suranjana Chakrabarty, Anup Ghosh\*

*Department of Condensed Matter Physics and Materials Sciences, S. N. Bose National*

*Centre for Basic Sciences, Kolkata 700106, India*

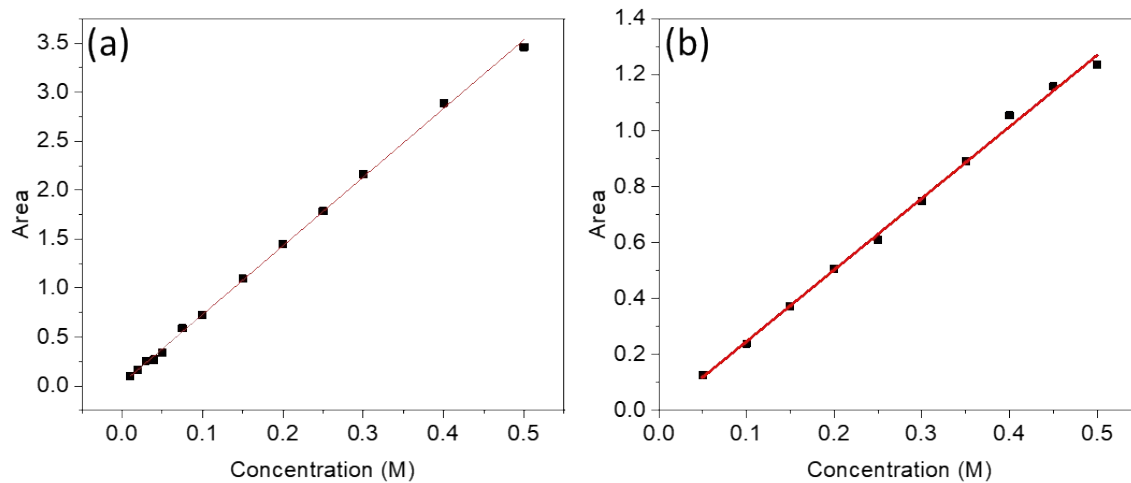

Figure S1: (a) Plot of C=C IR absorbance of PC vs concentration (b) Plot of C=C IR absorbance of PCP vs concentration
